# Supplementary material for: Treatment of corn with lactic acid delayed in vitro ruminal degradation without compromising fermentation: a biological and morphological monitoring study
Source: Frontiers journal article supplement (doi:10.3389/fvets.2024.1336800), 2024-01-22

## Supplementary Table

List of primers for real-time PCR assays.

| Target microbes                  | Primers (5'–3') <sup>1</sup>                                        | Length (bp) | References                  |
|----------------------------------|---------------------------------------------------------------------|-------------|-----------------------------|
| Total bacteria <sup>2</sup>      | F: CGGCAACGAGCGCAACCC<br>R: CCATTGTAGCACGTGTGTAGCC                  | 130         | Denman and McSweeney (2006) |
| <i>Ruminococcus flavefaciens</i> | F: CGAACGGAGATAATTTGAGTTTACTTAGG<br>R: CGGTCTCTGTATGTTATGAGGTATTACC | 132         | Denman and McSweeney (2006) |
| <i>Prevotella</i> spp.           | F: GGTTCTGAGAGGAAGGTCCCC<br>R: TCCTGCACGCTACTTGGCTG                 | 121         | Bekele et al. (2010)        |
| <i>Prevotella ruminicola</i>     | F: GAAAGTCGGATTAATGCTCTATGTTG<br>R: CATCCTATAGCGGTAAACCTTTGG        | 74          | Stevenson and Weimer (2007) |
| <i>Selenomonas ruminantium</i>   | F: CAATAAGCATTCCGCCTGGG<br>R: TTCACTCAATGTCAAGCCCTGG                | 138         | Stevenson and Weimer (2007) |
| <i>Streptococcus bovis</i>       | F: TTCCTAGAGATAGGAAGTTTCTTCGG<br>R: ATGATGGCAACTAACAATAGGGGT        | 127         | Stevenson and Weimer (2007) |
| <i>Butyrivibrio fibrisolvens</i> | F: TAACATGAGTTTGATCCTGGCTC<br>R: CGTTACTCACCCGTCCGC                 | 113         | Yang (2007)                 |
| <i>Ruminococcus albus</i>        | F: GTTTTAGGATTGTAAACCTCTGTCTT<br>R: CCTAATATCTACGCATTTCACCGC        | 273         | Yang (2007)                 |

<sup>1</sup> Primers were assembled from Integrated DNA Technologies, Inc. (Tokyo, Japan).

<sup>2</sup> The qPCR conditions for total bacteria and *R. flavefaciens* were as follows: one cycle of 50 °C for 2 min and 95 °C for 2 min for initial denaturation and 40 cycles of 95 °C for 15 s and 60 °C for 1 min for primer annealing.

The qPCR conditions for *Prevotella* spp. were as follows: denaturation at 95 °C for 10 min, followed by 40 cycles of 95 °C for 15 s, annealing at 55 °C for 5 s and 72 °C for 22 s.

The qPCR conditions for *P. ruminicola* and *S. ruminantium*, *S. bovis*, were as follows: initial hold for 10 min followed by 50 cycles of 95 °C for

15 s and 61 °C for 90 s for annealing.

The qPCR conditions for *B. fibrisolvens* and *R. albus* were as follows: initial hold at 50 °C for 2 min and 95 °C for 10 min for initial denaturation, followed by 40 cycles of 95 °C for 15 s and 60 °C for 1 min for primer annealing.

<sup>3</sup> References for Supplementary Table

Denman, S.E., McSweeney, C.S., 2006. Development of a real-time PCR assay for monitoring anaerobic fungal and cellulolytic bacterial populations within the rumen. *FEMS Microbiology Ecology* 58, 572–582.

Bekele, A.Z., Koike, S., Kobayashi, Y., 2010. Genetic diversity and diet specificity of ruminal *Prevotella* revealed by 16S rRNA gene-based analysis. *FEMS Microbiology Letters* 305, 49–57.

Stevenson, D.M., Weimer, P.J., 2007. Dominance of *Prevotella* and low abundance of classical ruminal bacterial species in the bovine rumen revealed by relative quantification real-time PCR. *Applied Microbiology and Biotechnology* 75, 165–174.

Yang, S., 2007. Effects of soybean oil and linseed oil supplementation on population of ruminal bacteria and fermentation parameters in dairy cows. PhD thesis, Chinese Academy of Agricultural Sciences, Beijing, China.

### Supplementary Figure

Morphological features of corn steeped with tap water for 48 h (A1), and corn steeped with 5% lactic acid (dissolved in tap water) for 48 h (B1) viewed at 1000x of focal length, fermentation at 3 (A2, B2), 6 (A3, B3), 12 (A4, B4), 18 (A5, B5) and 24 (A6, B6) hours viewed at 2500x of focal length, and bacterial cells appeared on the untreated corn (A7) and LA treated corn (B7) surface at 3 h of fermentation viewed at 40,000x of focal length.

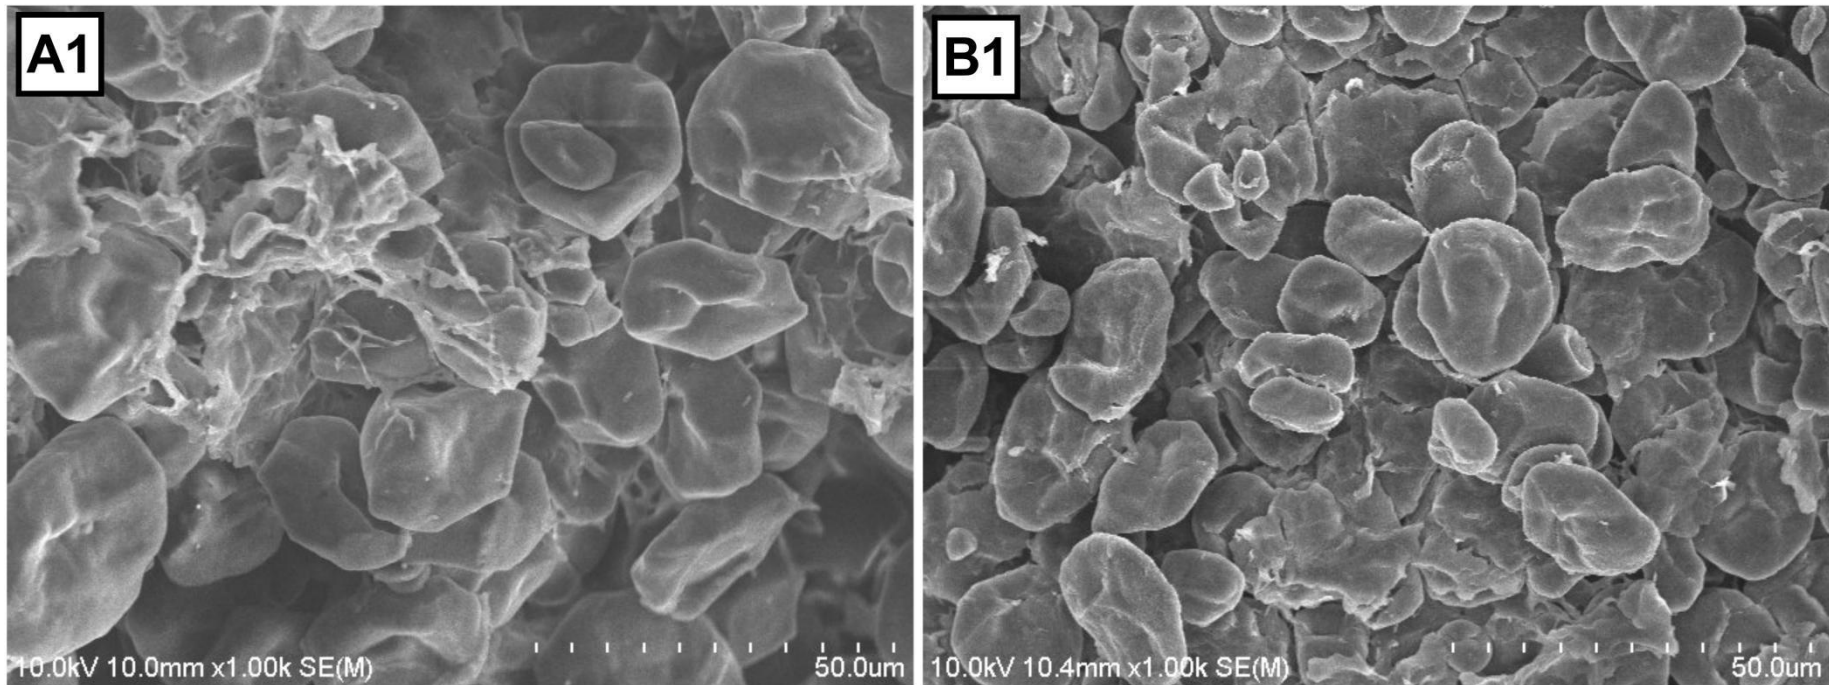

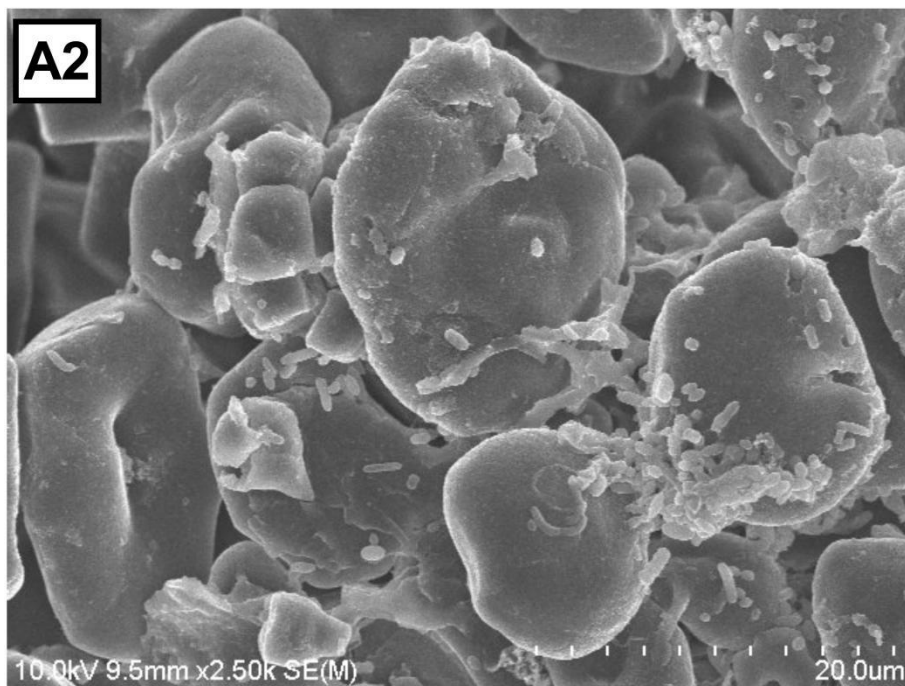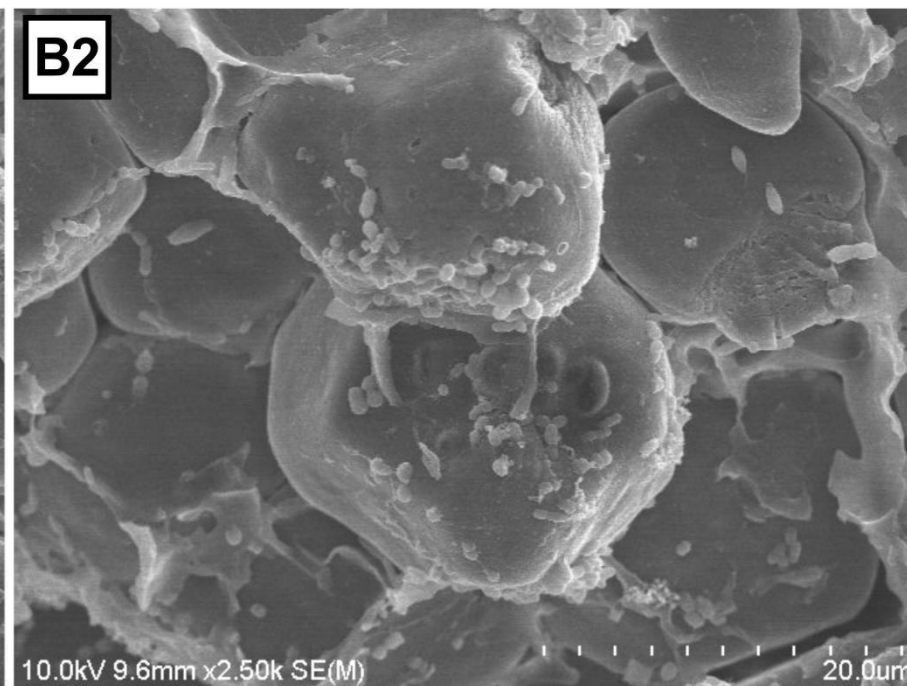

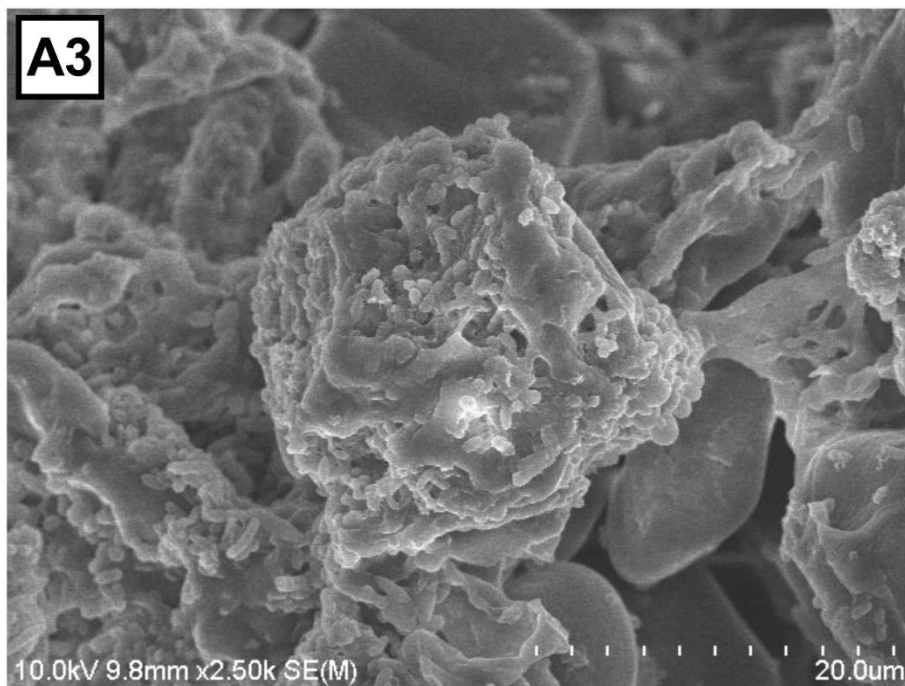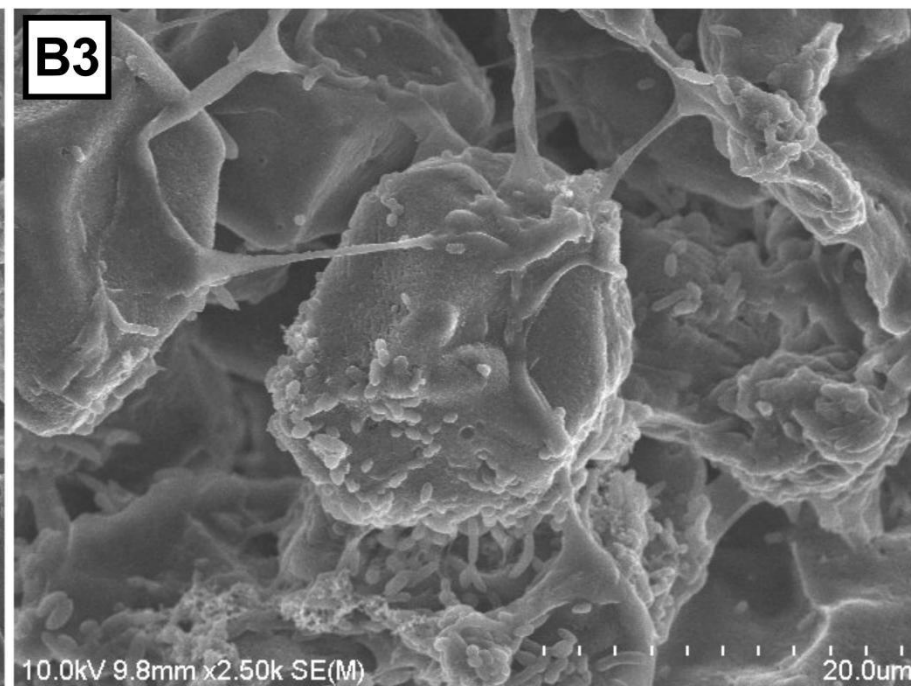

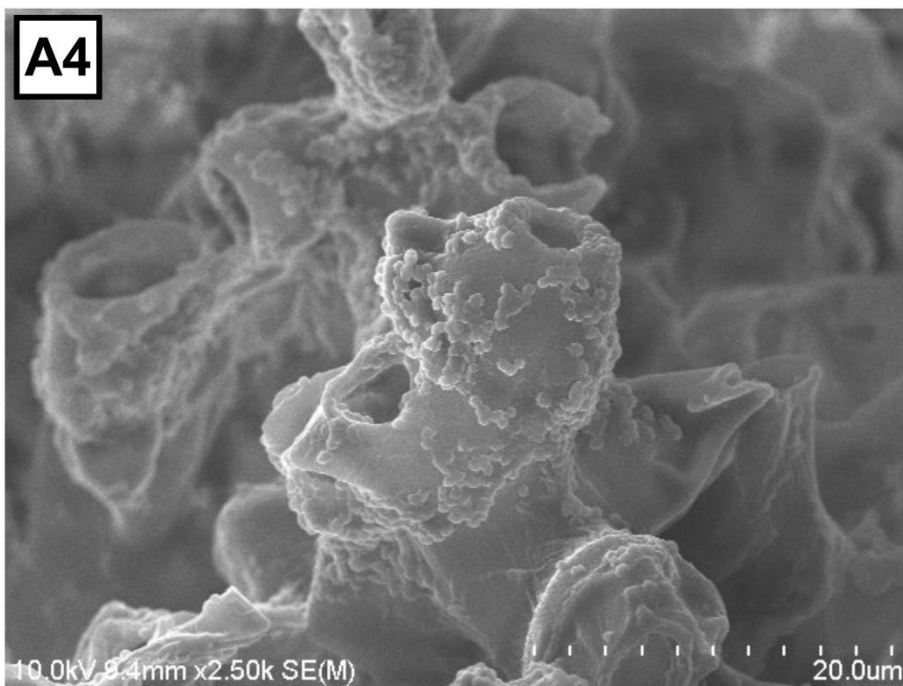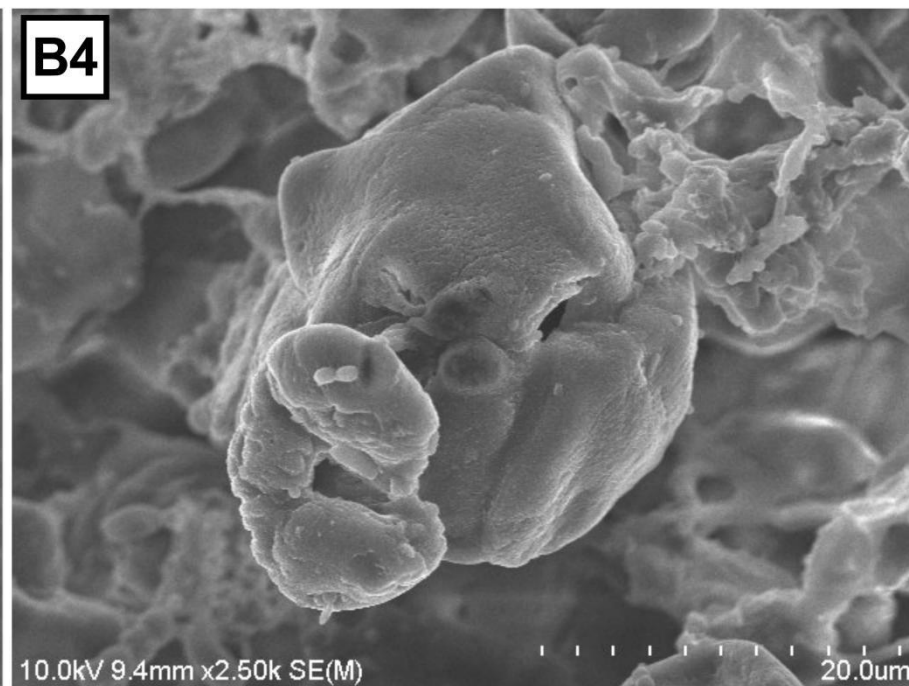

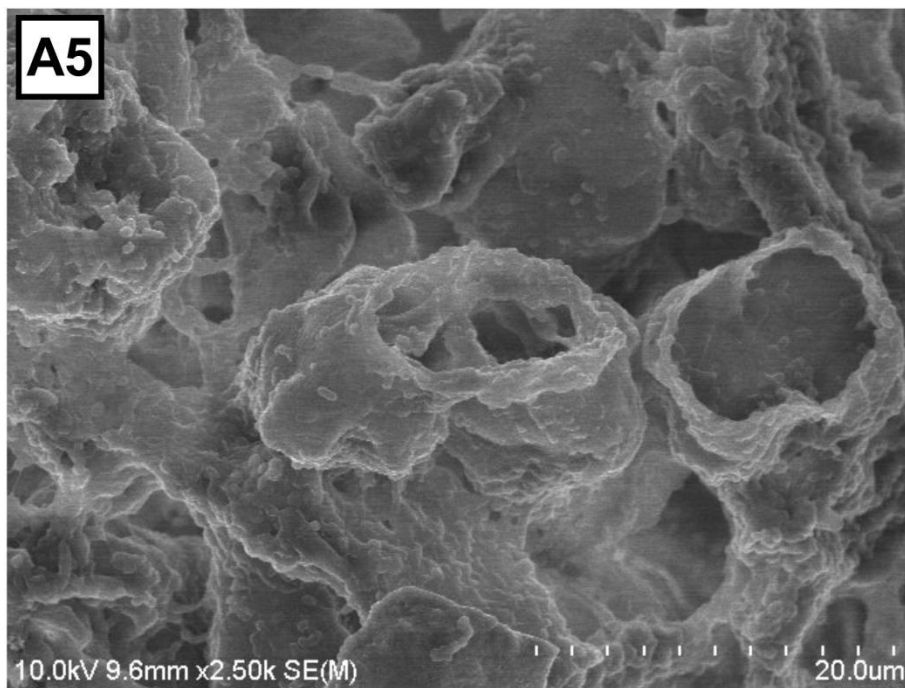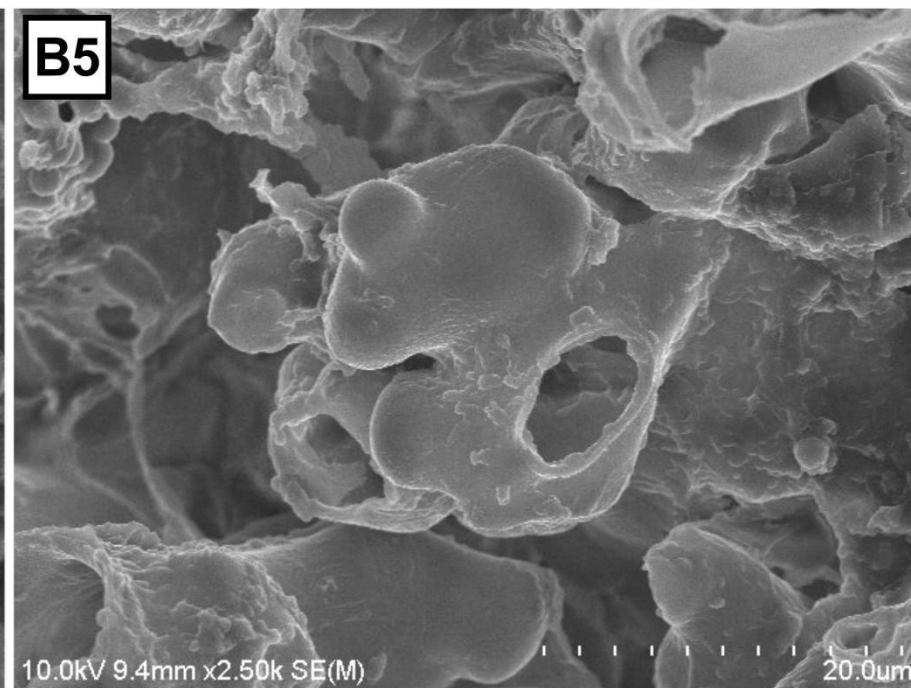

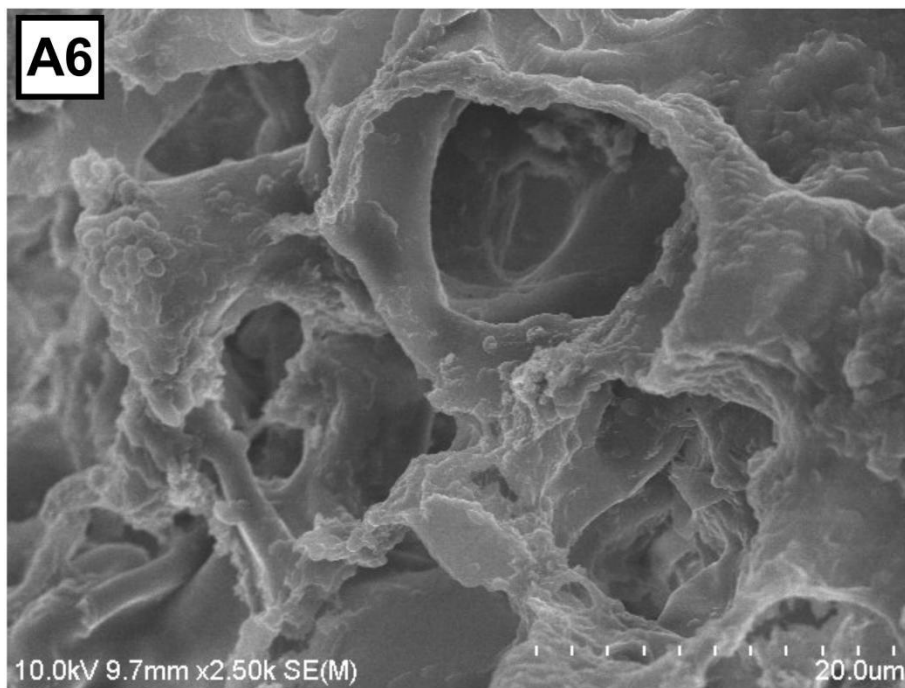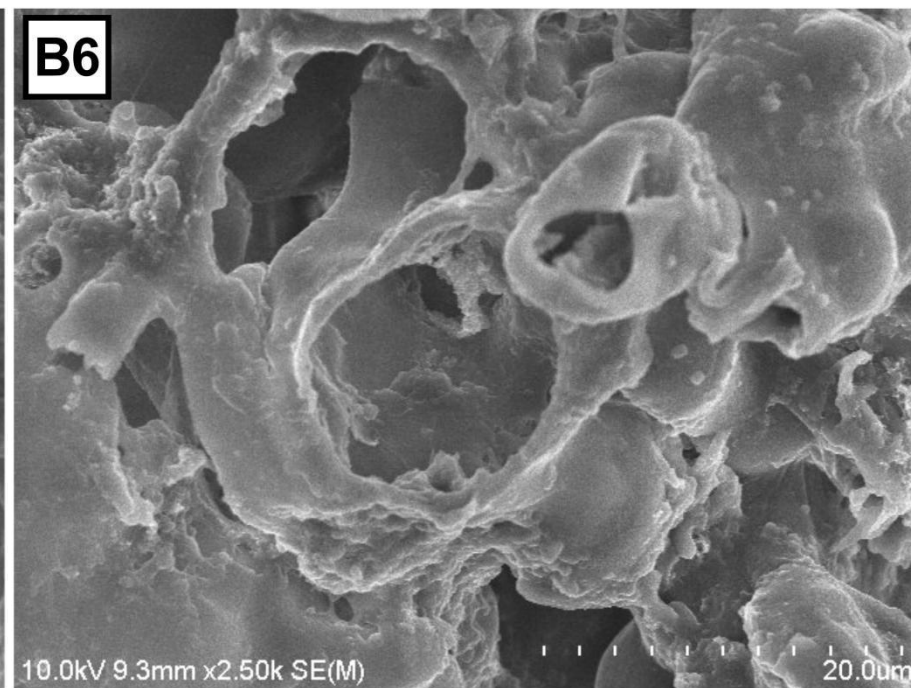



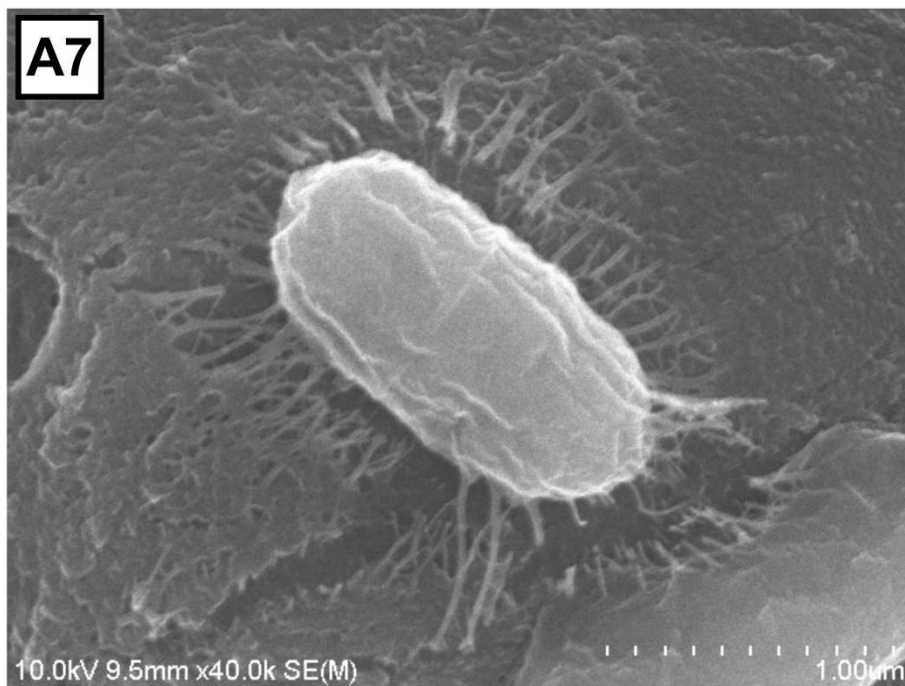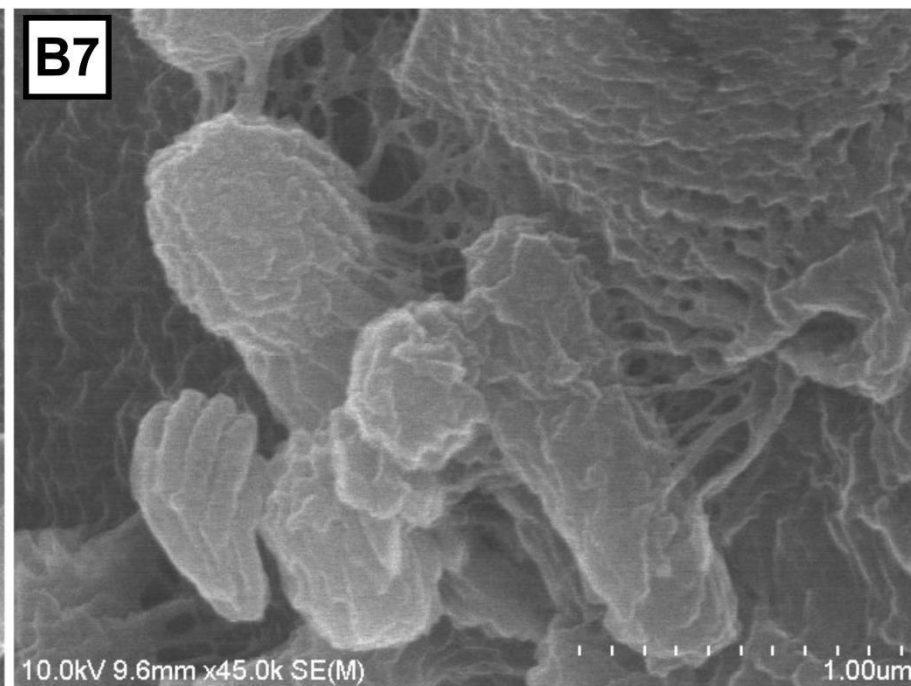

Supplement: Data_Sheet_1.pdf [file Data_Sheet_1.pdf]
